# Supplementary material
Source: PubMed Central journal article supplement (PMC3571694)
Supplement: NIHMS439903-supplement-01.pdf [file NIHMS439903-supplement-01.pdf]

## Supplement Material

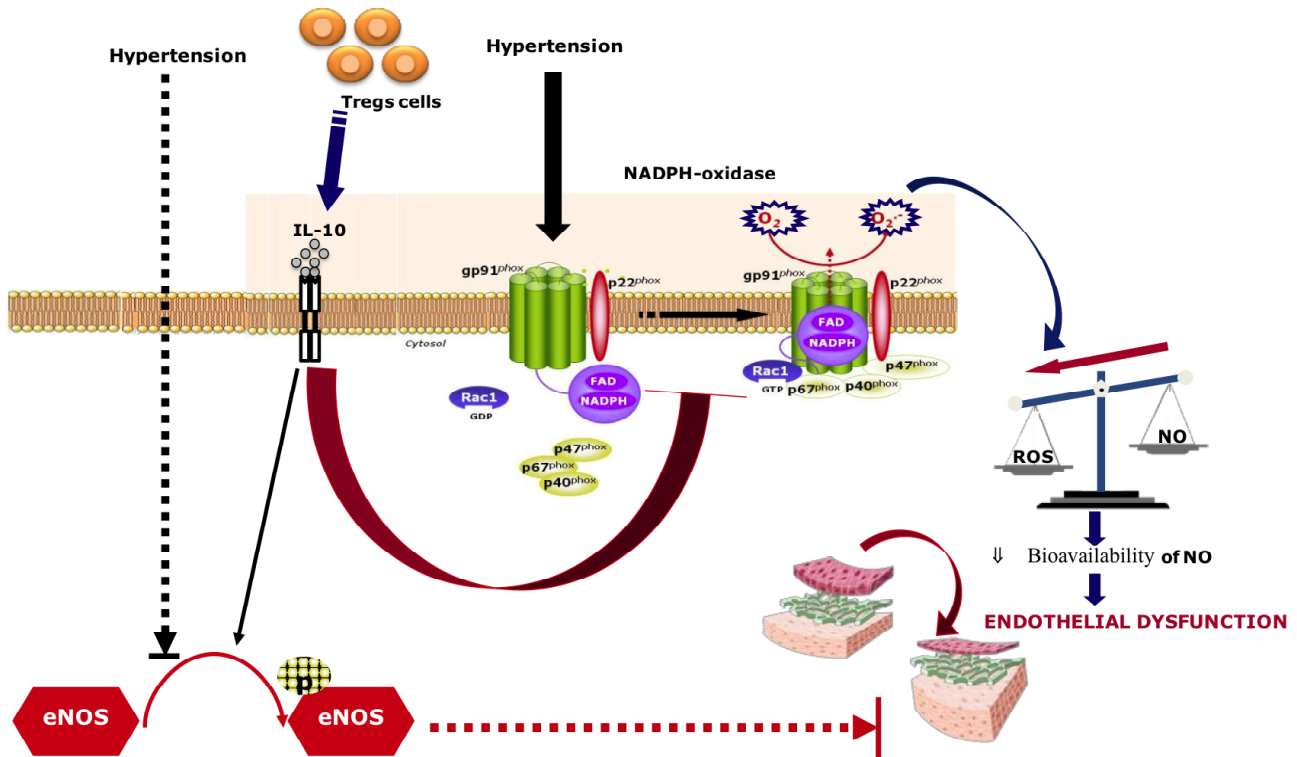

**Figure I.** In Ang II-induced hypertension, there is a decrease in Tregs number and IL-10 levels associated with increased NADPH oxidase activity and reduced eNOS phosphorylation. These events are responsible for impaired microvascular endothelium-dependent relaxation. Our results indicate that Tregs release IL-10, which binds to the IL-10 receptor, and then through intermediate signaling pathways rescue eNOS phosphorylation, inhibit NADPH oxidase activity and subsequently improve microvascular endothelium-dependent relaxation.

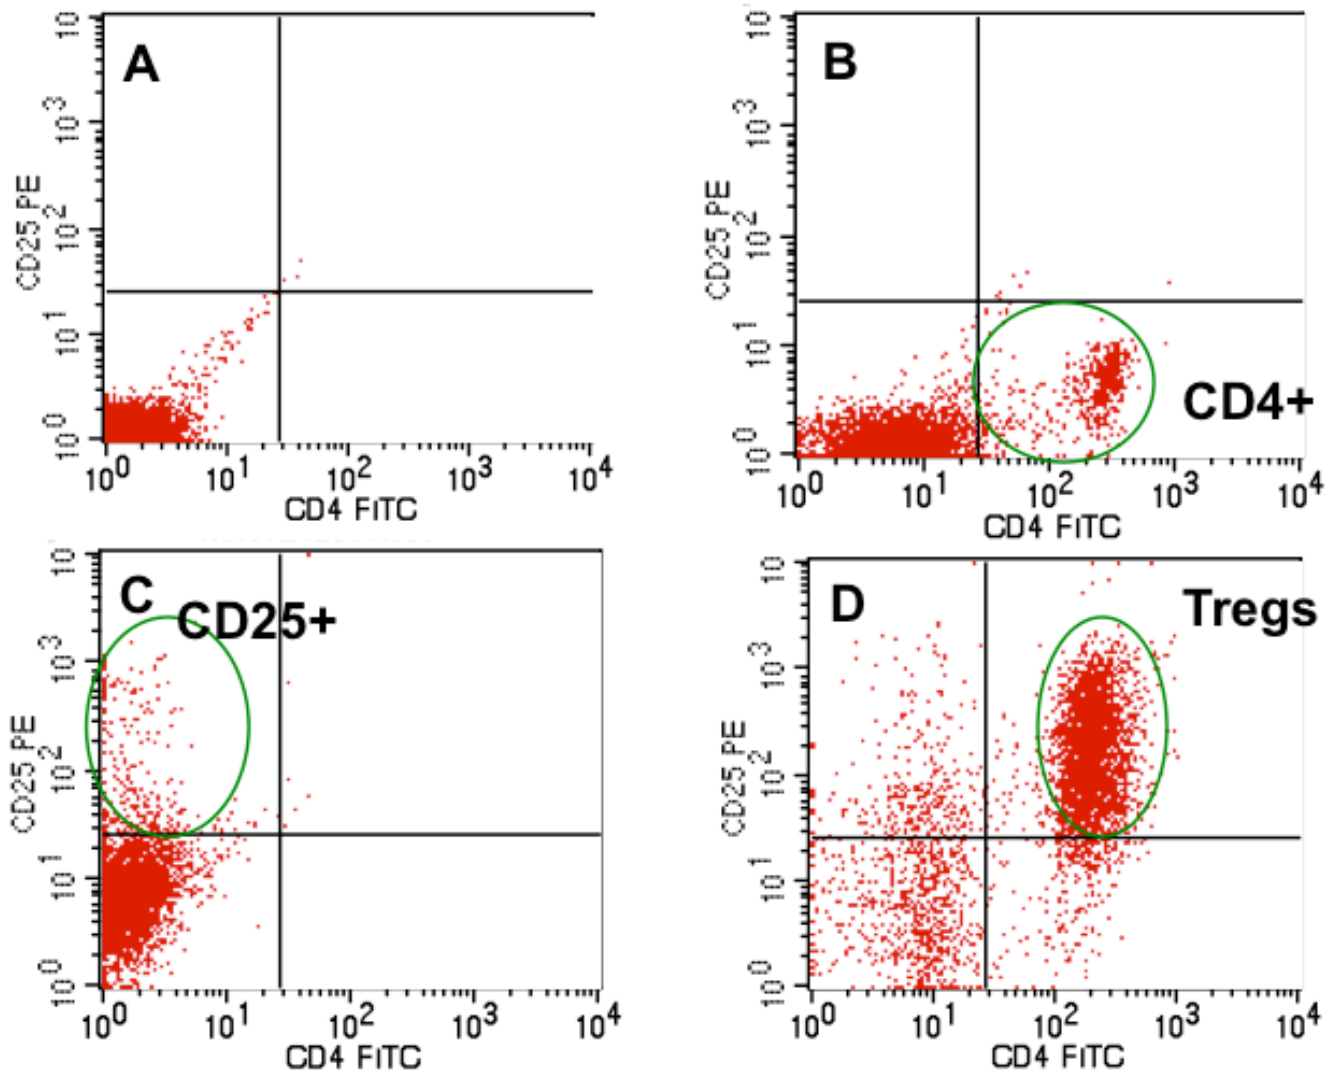

**Figure II:** Isolation of CD4+CD25+ regulatory T cells by flow cytometry sorting: CD4+CD25+ regulatory T cells were isolated from mice spleen cell suspension using the CD4+CD25+ regulatory T Cell Isolation Kit “miltenyibiotec.com” (A) negative control without any antibody, (B) isolation of CD4+ using CD4+FITC antibody, (C) isolation of CD25+ using CD25+PE antibody, (D) CD4+CD25+ regulatory T cells isolation using CD4+FITC and CD25+PE antibodies.
